# Supplementary material
Source: PubMed Central journal article supplement (PMC5227651)
Supplement: NIHMS840425-supplement-Supplemental.pdf [file NIHMS840425-supplement-Supplemental.pdf]

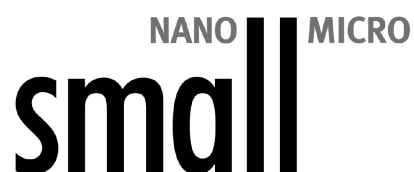

## Supporting Information

for *Small.*, DOI: 10.1002/sml.201403248

Reversibly Extracellular pH Controlled Cellular Uptake and  
Photothermal Therapy by PEGylated Mixed-Charge Gold  
Nanostars

*Shouju Wang, Zhaogang Teng, Peng Huang, Dingbin Liu,  
Ying Liu, Ying Tian, Jing Sun, Yanjun Li, Huangxian Ju,  
Xiaoyuan Chen, and Guangming Lu\**

## Supporting Information

### Reversibly Extracellular pH Controlled Cellular Uptake and Photothermal Therapy by PEGylated Mixed-Charge Gold Nanostars

Shouju Wang, Zhaogang Teng, Peng Huang, Dingbin Liu, Ying Liu, Ying Tian, Jing Sun, Yanjun Li, Huangxian Ju, Xiaoyuan Chen and Guangming Lu\*

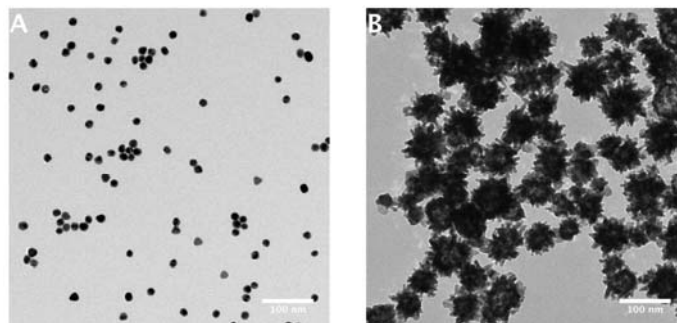

**Figure S1.** TEM images of gold particles (A) and gold nanostars (B) prepared by growth of gold particles. Scale bar: 100 nm.

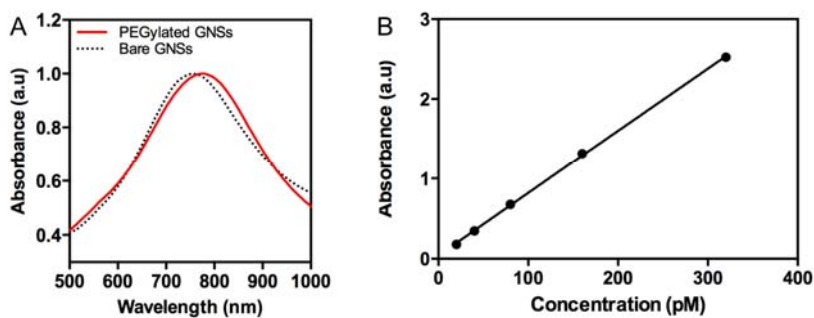

**Figure S2.** (A) UV-Vis spectra of GNSs before and after PEGylation. (B) Plot of absorbance of PEGylated GNSs at 780 nm vs. their concentration.

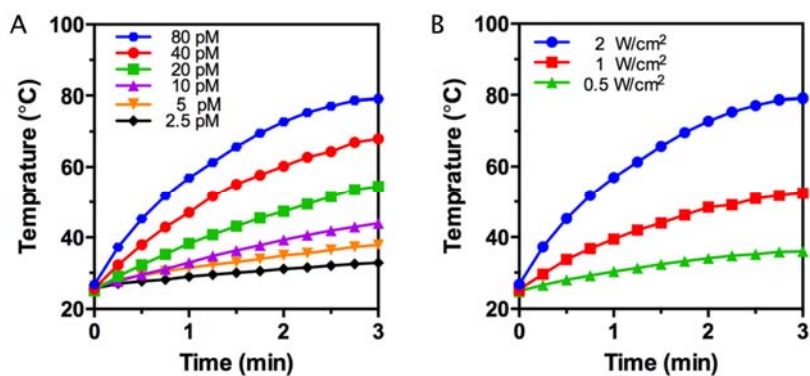

**Figure S3.** (A) Heating curves of GNS-N/C 4 solution at concentration of 2.5, 5, 10, 20, 40 and 80 pM upon 808 nm laser irradiation at 2 W/cm<sup>2</sup> for 3 min. (B) Heating curves of GNS-N/C 4 solution (80 pM) upon 808 nm laser irradiation at 0.5, 1 and 2 W/cm<sup>2</sup> for 3 min.

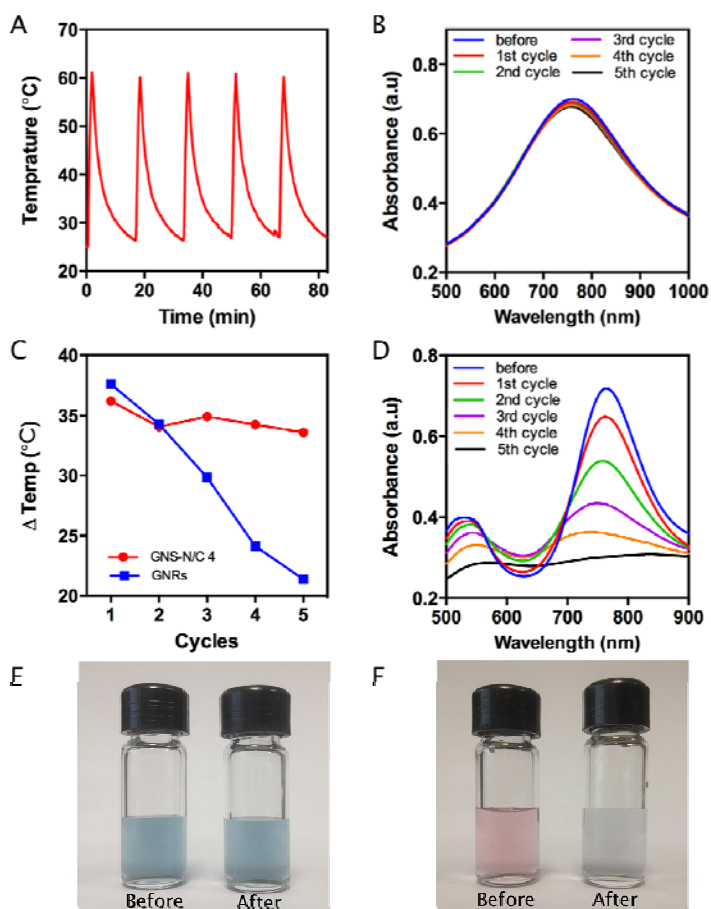

**Figure S4.** (A) Heating curves of GNS-N/C **4** solution (80 pM) irradiated by an 808 nm laser ( $2 \text{ W/cm}^2$ ) for five ON-OFF cycles (ON: 1.5 min, OFF: 15.5 min). (B) Corresponding UV-Vis spectra of GNS-N/C **4** solution before irradiation and at the end of each cycle of irradiation. (C) Change of temperature of GNS-N/C **4** (40 pM,  $\sim 0.7$  OD) and PEGylated GNRs ( $\sim 0.7$  OD) at the end of each laser heating cycle for five cycles. (D) Corresponding UV-Vis spectra of PEGylated GNRs solution before and at the end of each laser heating cycle. Digital photos of GNS-N/C **4** (E) and PEGylated GNRs (F) after five cycles of laser heating.

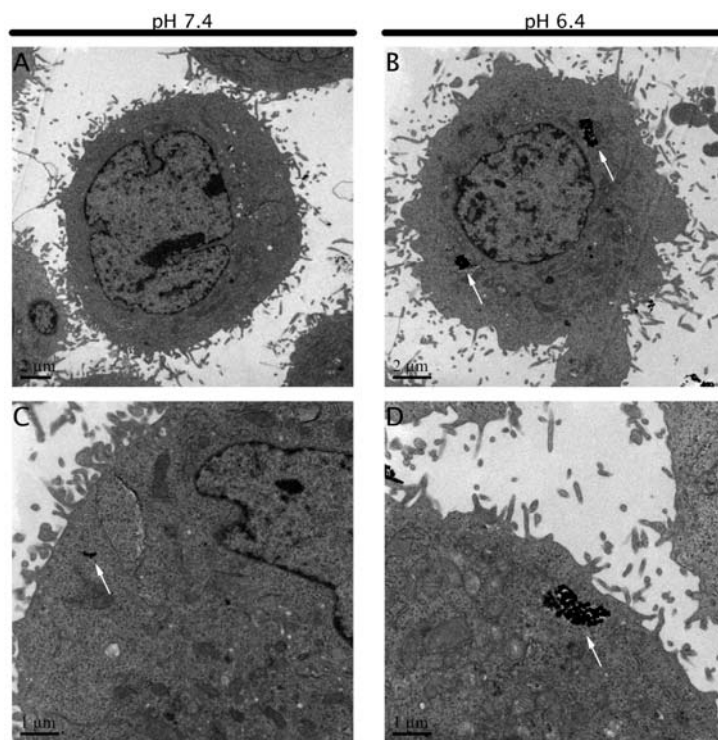

**Figure S5.** TEM images of HeLa cells incubated with 80 pM GNS-N/C **4** at pH 7.4 (A, C) or pH 6.4 (B, D). White arrows indicate GNSs in cells.

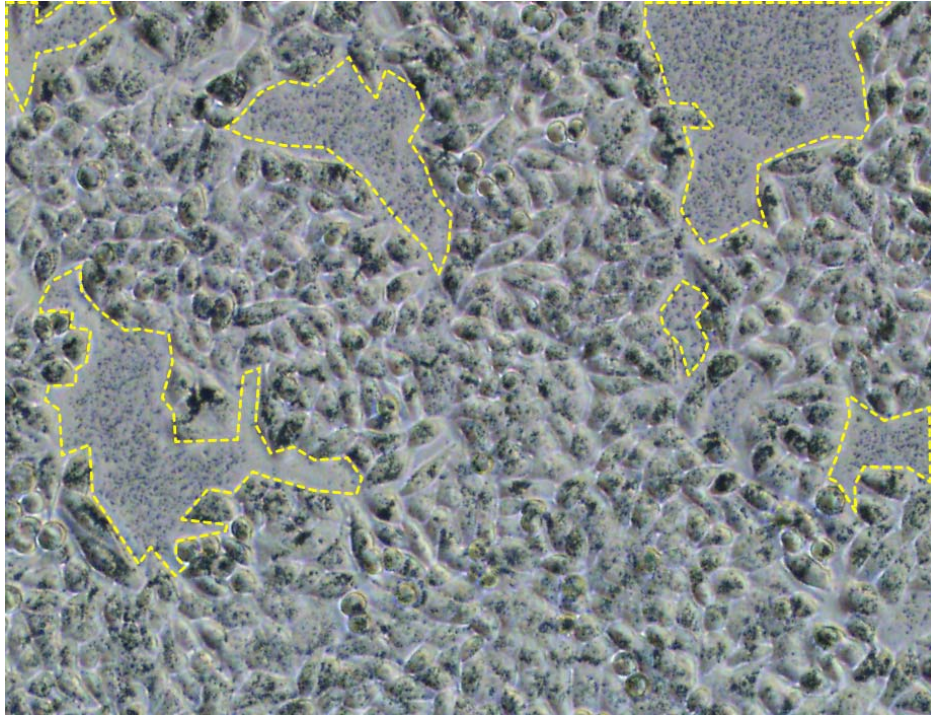

**Figure S6.** Optical microscopic image of HeLa cells after incubation with GNS-NH<sub>2</sub> for 4 h. The background circled in dashed lines showed plenty of aggregations attached to the substrate of cell culture dish.

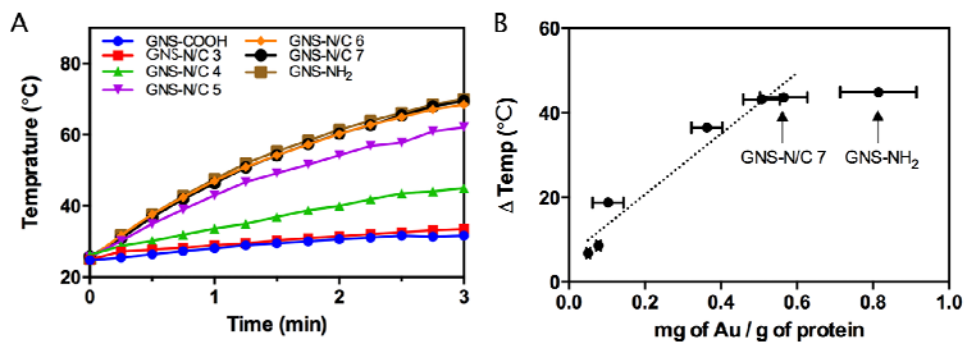

**Figure S7.** (A) Heating curves of cell suspensions in PBS upon 808 nm laser irradiation at 2 W/cm<sup>2</sup> for 3 min. Cells were incubated with GNS-NH<sub>2</sub>, GNS-COOH, GNS-N/C 3-7 at concentration of 80 pM for 4 h, then washed and resuspended in equal volume of PBS. (B) Plot of the change of temperature as a function of the degree of cellular uptake. The

linear relationship between the change of temperature and the uptake of PEGylated mixed-charge GNSs is depicted in dash line.  $R^2 = 0.94$ .

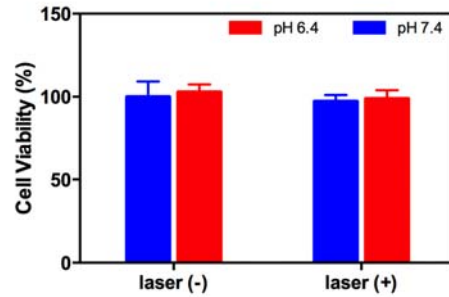

**Figure S8.** Cell viability of HeLa cells incubated in DMEM at pH 6.4 or 7.4 for 4 h with or without laser irradiation at  $2 \text{ W/cm}^2$  for 3 min.

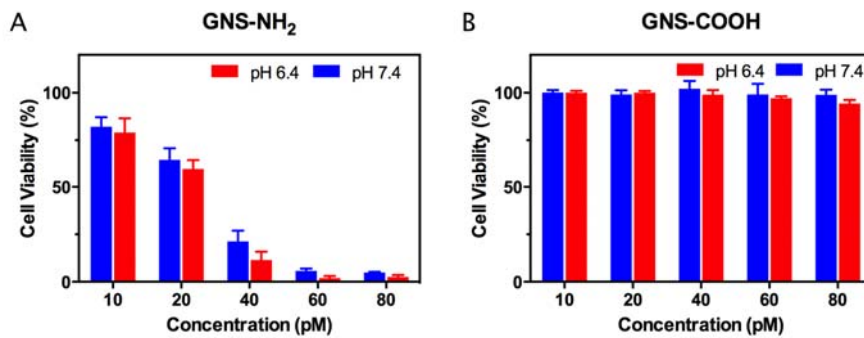

**Figure S9.** Cell viability of HeLa cells incubated with 80 pM GNS-NH<sub>2</sub> or GNS-COOH at pH 6.4 or 7.4 for 4 h followed by 808 nm laser irradiation at  $2 \text{ W/cm}^2$  for 3 min.



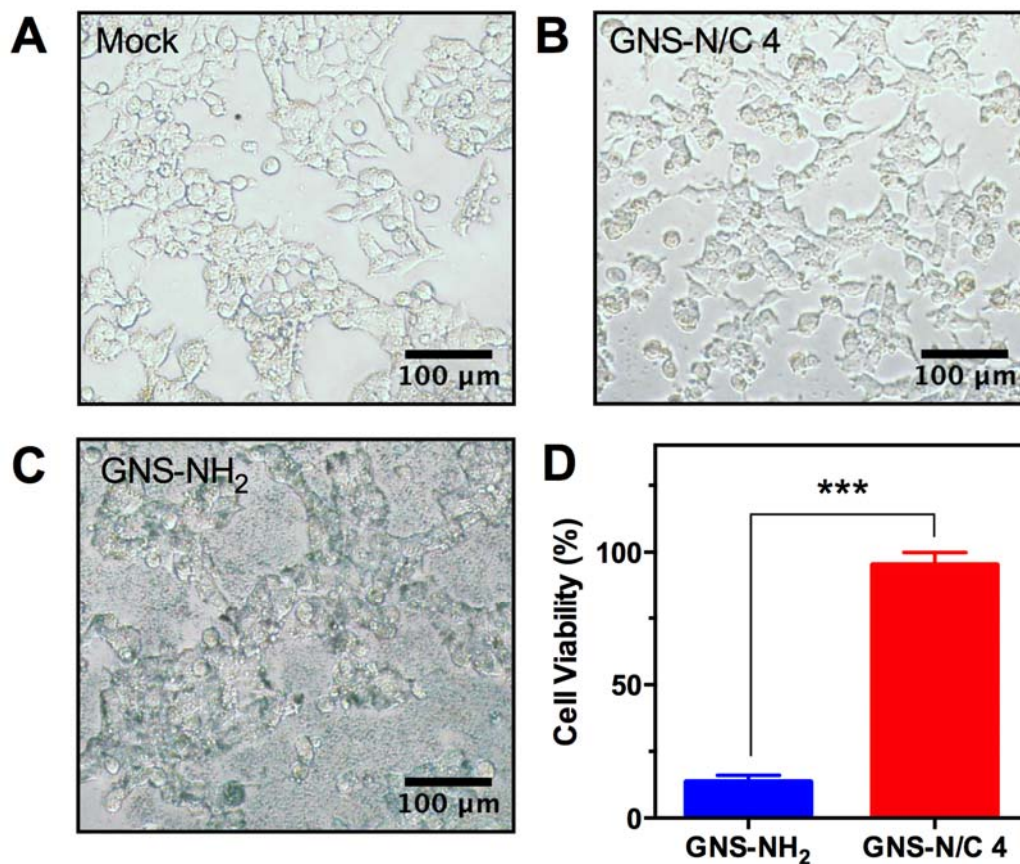

**Figure S10.** Optical microscopic images of 293T cells incubated with nothing (A) or 80 pM of GNS-N/C 4 (B) or GNS-NH<sub>2</sub> (C) for 4 h. The background of (C) is dark due to the aggregation of GNS-NH<sub>2</sub> attached on the substrate of cell cultural dish. (D) Cell viability of 293T cells incubated with GNS-N/C 4 or GNS-NH<sub>2</sub> after laser irradiation (808 nm, 2 W/cm<sup>2</sup>, 3 min). Asterisks (\*\*\*) denote statistically significant difference ( $p < 0.001$ ) calculated with two-sample t-test.

## Supplementary Tables

**Table S1.** Hydrodynamic diameters of bare GNSs and PEGylated GNSs in water.

|                           | <b>DLS sizes (nm)</b> |                          | <b>DLS sizes (nm)</b> |
|---------------------------|-----------------------|--------------------------|-----------------------|
| <b>Bare GNSs</b>          | $77.5 \pm 3.2$        | <b>PEGylated</b>         | $94.3 \pm 4.3$        |
|                           |                       | <b>GNSs<sup>a)</sup></b> |                       |
| <b>GNS-NH<sub>2</sub></b> | $92.2 \pm 3.4$        | <b>GNS-N/C 3</b>         | $95.4 \pm 3.1$        |
| <b>GNS-N/C 4</b>          | $91.6 \pm 5.8$        | <b>GNS-N/C 5</b>         | $94.7 \pm 3.7$        |
| <b>GNS-N/C 6</b>          | $95.7 \pm 5.0$        | <b>GNS-N/C 7</b>         | $95.8 \pm 6.6$        |
| <b>GNS-COOH</b>           | $94.3 \pm 4.7$        |                          |                       |

<sup>a)</sup>Hydrodynamic diameter of PEGylated GNSs is calculated as the average of hydrodynamic diameters of GNS-NH<sub>2</sub>, GNS-COOH, GNS-N/C 3-7.

**Table S2.** Hydrodynamic diameters of GNS-N/C 4, GNS-COOH, GNS-N/M and GNS-NH<sub>2</sub> after incubation in pH 7.4 DMEM for three days.

|                  | <b>DLS sizes (nm)</b> |                           | <b>DLS sizes (nm)</b> |
|------------------|-----------------------|---------------------------|-----------------------|
| <b>GNS-N/C 4</b> | $104.0 \pm 3.7$       | <b>GNS-COOH</b>           | $106.7 \pm 6.2$       |
| <b>GNS-N/M</b>   | $125.3 \pm 8.9$       | <b>GNS-NH<sub>2</sub></b> | $343.2 \pm 14.8$      |
